# Supplementary material for: Bone marrow stromal cells interaction with titanium; Effects of composition and surface modification
Source: PubMed Central journal article supplement (PMC6530826; doi:10.1371/journal.pone.0216087), 2019-05-22
Supplement: pone.0216087.s001.pdf [file pone.0216087.s001.pdf]

**Surface roughness Sa**

| Sample   | Location | Ti $\mu\text{m}$ | Ti+NT $\mu\text{m}$ | Ti64 $\mu\text{m}$ | Ti64+NT $\mu\text{m}$ |
|----------|----------|------------------|---------------------|--------------------|-----------------------|
| Sample 1 | 1        | 0.033            | 0.18                | 0.033              | 0.041                 |
|          | 2        | 0.03             | 0.176               | 0.036              | 0.036                 |
| Sample 2 | 1        | 0.03             | 0.218               | 0.037              | 0.05                  |
|          | 2        | 0.035            | 0.21                | 0.039              | 0.034                 |
|          |          | 0.032            | 0.196               | 0.03625            | 0.04025               |
|          |          | 0.00212132       | 0.01827567          | 0.00216506         | 0.006179604           |
|          |          | 32               | 196                 | 36.25              | 40.25                 |
|          |          | 2                | 18                  | 2                  | 6                     |

**Surface roughness Sq**

| Sample   | Location | Ti $\mu\text{m}$ | Ti+NT $\mu\text{m}$ | Ti64 $\mu\text{m}$ | Ti64+NT $\mu\text{m}$ |
|----------|----------|------------------|---------------------|--------------------|-----------------------|
| Sample 1 | 1        | 0.041            | 0.233               | 0.042              | 0.052                 |
|          | 2        | 0.037            | 0.2226              | 0.048              | 0.046                 |
| Sample 2 | 1        | 0.038            | 0.288               | 0.047              | 0.062                 |
|          | 2        | 0.043            | 0.28                | 0.049              | 0.042                 |
|          |          | 0.03975          | 0.2559              | 0.0465             | 0.0505                |
|          |          | 0.002384848      | 0.02848034          | 0.00269258         | 0.00753326            |
|          |          | 39.75            | 255.9               | 46.5               | 50.5                  |
|          |          | 2                | 28                  | 3                  | 8                     |

**Surface roughness Sz**

| Sample   | Location | Ti $\mu\text{m}$ | Ti+NT $\mu\text{m}$ | Ti64 $\mu\text{m}$ | Ti64+NT $\mu\text{m}$ |
|----------|----------|------------------|---------------------|--------------------|-----------------------|
| Sample 1 | 1        | 0.273            | 2.542               | 0.395              | 0.628                 |
|          | 2        | 0.243            | 2.456               | 0.54               | 0.632                 |
| Sample 2 | 1        | 0.402            | 2.746               | 0.349              | 0.753                 |
|          | 2        | 0.451            | 2.677               | 0.392              | 0.519                 |
|          |          | 0.34225          | 2.60525             | 0.419              | 0.633                 |
|          |          | 0.086664223      | 0.11317547          | 0.07219072         | 0.082797947           |
|          |          | 342.25           | 2605.25             | 419                | 633                   |
|          |          | 87               | 113                 | 72                 | 83                    |

**Contact angle measurements**

| Sample   | Data | Ti      | Ti+NT   | Ti64    | Ti64+NT |
|----------|------|---------|---------|---------|---------|
| Sample 1 | 1    | 42.7    | 15.2    | 45.4    | 15.8    |
|          | 2    | 50.15   | 24.55   | 48.7    | 22.05   |
| Sample 2 | 1    | 41.05   | 17.1    | 50.7    | 7.4     |
|          | 2    | 42.65   | 26.1    | 50.85   | 14.15   |
|          |      | 44.1375 | 20.7375 | 48.9125 | 14.85   |
|          |      | 4       | 5       | 2       | 5       |
