# Supplementary material for: Bone marrow stromal cells interaction with titanium; Effects of composition and surface modification
Source: PubMed Central journal article supplement (PMC6530826; doi:10.1371/journal.pone.0216087), 2019-05-22
Supplement: pone.0216087.s002.pdf [file pone.0216087.s002.pdf]

|           |       | Ti  | Ti-NT | Ti64 | Ti64+NT |
|-----------|-------|-----|-------|------|---------|
| day 3 XTT | Exp.1 | 102 |       | 420  |         |
|           |       | 98  |       | 547  |         |
|           | Exp.2 | 96  | 16    | 137  | 163     |
|           |       | 104 | 75    | 230  | 107     |
|           |       |     | 146   | 186  |         |
|           | Exp.3 | 97  | 96    | 129  | 106     |
| 103       |       | 67  | 120   | 121  |         |

|          |         | Ti  | Ti-NT | Ti64 | Ti64+NT |
|----------|---------|-----|-------|------|---------|
| adhesion | 6 hours | 107 | 139   | 78   | 50      |
|          |         | 46  | 125   | 49   | 39      |
|          |         | 147 | 107   |      | 171     |
