# Supplementary material for: Bone marrow stromal cells interaction with titanium; Effects of composition and surface modification
Source: PubMed Central journal article supplement (PMC6530826; doi:10.1371/journal.pone.0216087), 2019-05-22
Supplement: pone.0216087.s003.pdf [file pone.0216087.s003.pdf]

|      |       | Relative expression |       |      |         |
|------|-------|---------------------|-------|------|---------|
|      |       | Ti                  | Ti+NT | Ti64 | Ti64+NT |
| GLI2 | Exp.1 | 102                 | 94    | 70   | 14      |
|      |       | 92                  | 93    | 67   | 15      |
|      |       | 111                 | 91    | 65   | 14      |
|      |       | 102                 | 80    | 73   | 44      |
|      |       | 105                 | 79    | 70   | 45      |
|      |       | 101                 | 83    | 69   | 45      |
|      |       | 97                  | 84    | 96   | 20      |
|      |       | 98                  | 84    | 85   | 21      |
|      |       | 93                  | 85    | 92   | 19      |
|      | Exp.2 | 110                 | 65    | 77   | 78      |
|      |       | 107                 | 75    | 68   | 77      |
|      |       | 94                  | 101   | 61   | 87      |
|      |       | 94                  | 91    | 64   | 87      |
|      |       | 98                  | 90    | 103  | 80      |
|      |       | 98                  | 89    | 98   | 77      |
|      | Exp.3 | 92                  | 99    | 112  | 88      |
|      |       | 96                  | 97    | 99   | 93      |
|      |       | 92                  | 99    | 104  | 89      |
|      |       | 106                 | 102   | 93   | 87      |
|      |       | 105                 | 94    | 84   | 88      |
|      |       | 103                 | 89    | 86   | 92      |
|      |       | 103                 | 95    | 102  | 112     |
|      |       | 94                  | 94    | 105  | 125     |
|      | 108   | 100                 | 97    | 107  |         |

|      |       | Relative expression |       |      |         |
|------|-------|---------------------|-------|------|---------|
|      |       | Ti                  | Ti+NT | Ti64 | Ti64+NT |
| IL-6 | Exp.1 | 99                  | 81    | 83   | 92      |
|      |       | 93                  | 87    | 80   | 90      |
|      |       | 89                  | 74    | 78   | 110     |
|      |       | 89                  | 80    | 75   | 95      |
|      |       | 109                 | 73    | 116  | 108     |
|      |       | 121                 | 76    | 112  | 107     |
|      | Exp.2 | 64                  | 48    | 88   | 61      |
|      |       | 69                  | 49    | 89   | 59      |
|      |       | 65                  | 48    | 89   | 53      |
|      |       | 94                  | 55    | 79   | 78      |
|      |       | 94                  | 53    | 83   | 81      |
|      |       | 88                  | 57    | 82   | 77      |
|      |       | 151                 | 76    | 115  | 99      |
|      |       | 138                 | 72    | 122  | 98      |
|      |       | 136                 | 74    | 120  | 99      |

|       |       | Relative expression |       |      |         |
|-------|-------|---------------------|-------|------|---------|
|       |       | Ti                  | Ti+NT | Ti64 | Ti64+NT |
| CD40L | Exp.1 | 109                 | 108   | 76   | 177     |
|       |       | 88                  | 116   | 72   | 161     |
|       |       | 116                 | 98    | 64   | 187     |
|       |       | 98                  | 101   | 160  | 160     |
|       |       | 99                  | 108   | 177  | 106     |
|       |       | 94                  | 109   | 141  | 104     |
|       |       | 111                 | 125   | 150  | 103     |
|       |       | 93                  | 84    | 150  | 122     |
|       |       | 93                  | 85    | 128  | 110     |
|       | Exp.2 | 135                 | 74    | 320  | 126     |
|       |       | 142                 | 60    | 453  | 150     |
|       |       | 69                  | 198   | 395  | 77      |
|       |       | 66                  | 134   | 133  | 87      |
|       |       | 100                 | 53    | 101  | 131     |
|       |       | 88                  | 56    | 99   | 123     |
|       | Exp.3 | 69                  | 80    | 75   | 74      |
|       |       | 65                  | 74    | 87   | 84      |
|       |       | 65                  | 81    | 69   | 93      |
|       |       | 92                  | 90    | 76   | 72      |
|       |       | 92                  | 97    | 66   | 74      |
|       |       | 93                  | 109   | 73   | 70      |
|       |       | 136                 | 106   | 118  | 140     |
|       |       | 142                 | 101   | 133  | 133     |
|       |       | 145                 | 110   | 136  | 131     |
