# Supplementary material for: Bone marrow stromal cells interaction with titanium; Effects of composition and surface modification
Source: PubMed Central journal article supplement (PMC6530826; doi:10.1371/journal.pone.0216087), 2019-05-22
Supplement: pone.0216087.s004.pdf [file pone.0216087.s004.pdf]

| ALP-1 |       | Ti    | Ti+NT | Ti64 | Ti64+NT |
|-------|-------|-------|-------|------|---------|
|       |       | EXP.1 | 78    | 86   | 123     |
|       | 122   |       | 114   | 191  | 118     |
|       | EXP.2 | 100   | 51    | 91   | 44      |
| 100   |       | 49    | 115   | 35   |         |

| CoLA-1 |       | Ti    | Ti+NT | Ti64 | Ti64+NT |
|--------|-------|-------|-------|------|---------|
|        |       | EXP.1 | 99    | 82   | 90      |
|        | 101   |       | 86    | 89   | 88      |
|        | EXP.2 | 89    | 102   | 89   | 118     |
| 111    |       | 96    | 82    | 108  |         |

| OCN |       | Ti    | Ti+NT | Ti64 | Ti64+NT |
|-----|-------|-------|-------|------|---------|
|     |       | EXP.1 | 100   | 87   | 67      |
|     | 100   |       | 84    | 74   | 83      |
|     | EXP.2 | 101   | 146   | 152  | 156     |
| 99  |       | 142   | 153   | 141  |         |
